# Supplementary material for: Marked variation between winter and spring gut microbiota in free-ranging Tibetan Macaques (Macaca thibetana)
Source: PubMed Central journal article supplement (PMC4867428; doi:10.1038/srep26035), 2016-05-16
Supplement: srep26035-s1.pdf [file srep26035-s1.pdf]

## Supplementary Material

“Marked variation between winter and spring gut microbiota in free-ranging Tibetan Macaques (*Macaca thibetana*)”Binghua Sun, Xi Wang, Sofi Bernstein, Michael A. Huffman, Dong-Po Xia, Zhiyuan Gu<sup>1</sup>, Rui Chen, Lori K. Sheeran, R.S. Wagner, Jinhua Li

Supplementary Table S1. Summary of sample information and alpha diversity

| Individuals<br>ID | Sex    | Age<br>Class | Sampling<br>Period | Sampling<br>Date | OTUs | ACE   | Chao  | Shannon | Simpson | Coverage |
|-------------------|--------|--------------|--------------------|------------------|------|-------|-------|---------|---------|----------|
| YRX-W             | Female | Immature     | Winter             | 2015.01.01       | 989  | 4047  | 2226  | 4.32    | 0.085   | 0.949    |
| TXL-W             | Male   | Immature     | Winter             | 2015.01.04       | 1156 | 5155  | 2954  | 5.14    | 0.019   | 0.921    |
| TRY-W             | Male   | Immature     | Winter             | 2015.01.05       | 3213 | 23218 | 11045 | 5.61    | 0.021   | 0.853    |
| THY-W             | Female | Adult        | Winter             | 2015.01.11       | 1358 | 6526  | 3477  | 4.39    | 0.066   | 0.942    |
| BT-W              | Male   | Adult        | Winter             | 2015.01.11       | 1302 | 7022  | 4264  | 4.57    | 0.05    | 0.933    |
| TH-W              | Female | Adult        | Winter             | 2015.01.11       | 1077 | 4466  | 2725  | 4.53    | 0.054   | 0.943    |
| TXH-W             | Female | Adult        | Winter             | 2015.01.08       | 1362 | 5423  | 3580  | 5.11    | 0.018   | 0.935    |
| TRG-W             | Male   | Immature     | Winter             | 2015.01.11       | 804  | 3718  | 2128  | 3.73    | 0.112   | 0.943    |
| TRYx-W            | Female | Adult        | Winter             | 2015.01.08       | 1358 | 6919  | 3871  | 4.85    | 0.039   | 0.933    |
| TR-W              | Female | Adult        | Winter             | 2015.01.10       | 1885 | 10219 | 5448  | 4.52    | 0.065   | 0.931    |
| ZL-W              | Male   | Adult        | Winter             | 2015.01.12       | 1114 | 4474  | 2885  | 4.87    | 0.023   | 0.942    |
| HT-W              | Male   | Adult        | Winter             | 2015.01.08       | 994  | 3284  | 2186  | 5.26    | 0.013   | 0.938    |
| TXX-W             | Female | Adult        | Winter             | 2015.01.08       | 1254 | 6485  | 4075  | 4.65    | 0.059   | 0.928    |
| YCLO-W            | Male   | Immature     | Winter             | 2015.01.04       | 1643 | 7506  | 4658  | 5.18    | 0.024   | 0.936    |
| DS-W              | Male   | Adult        | Winter             | 2015.01.12       | 939  | 3850  | 2251  | 4.43    | 0.054   | 0.95     |
| YZ-W              | Female | Adult        | Winter             | 2015.01.05       | 1407 | 6004  | 3590  | 4.8     | 0.031   | 0.954    |
| HH-W              | Female | Adult        | Winter             | 2015.01.11       | 1061 | 4134  | 2498  | 4.1     | 0.089   | 0.952    |
| YXK-W             | Male   | Immature     | Winter             | 2015.01.03       | 874  | 3405  | 2099  | 4.62    | 0.033   | 0.938    |
| ZB-W              | Male   | Adult        | Winter             | 2015.01.06       | 863  | 3428  | 2270  | 4.9     | 0.022   | 0.924    |
| YM-W              | Female | Adult        | Winter             | 2015.01.12       | 943  | 3545  | 2323  | 4.74    | 0.029   | 0.945    |
| YRB-W             | Male   | Adult        | Winter             | 2015.01.18       | 1059 | 6090  | 3270  | 4.65    | 0.046   | 0.92     |
| YRQ-S             | Male   | Immature     | Spring             | 2015.03.30       | 1071 | 3409  | 2376  | 4.87    | 0.029   | 0.956    |
| HXM-S             | Male   | Immature     | Spring             | 2015.03.31       | 1412 | 5501  | 3954  | 5.16    | 0.022   | 0.944    |
| ZL-S              | Male   | Adult        | Spring             | 2015.04.01       | 1197 | 4673  | 2936  | 4.74    | 0.028   | 0.945    |
| YH-S              | Female | Adult        | Spring             | 2015.04.01       | 1371 | 5502  | 3532  | 5.15    | 0.018   | 0.944    |
| YCLA-S            | Female | Immature     | Spring             | 2015.03.31       | 1160 | 3105  | 2253  | 5.17    | 0.02    | 0.957    |
| YRL-S             | Female | Immature     | Spring             | 2015.04.03       | 1338 | 5416  | 3167  | 5.21    | 0.02    | 0.922    |
| ZB-S              | Male   | Adult        | Spring             | 2015.03.30       | 1370 | 4351  | 3167  | 5.2     | 0.019   | 0.95     |
| TRY-S             | Male   | Immature     | Spring             | 2015.03.24       | 948  | 3315  | 1995  | 4.34    | 0.064   | 0.951    |
| TXX-S             | Female | Adult        | Spring             | 2015.03.30       | 1236 | 5632  | 3352  | 5.11    | 0.023   | 0.924    |
| HT-S              | Male   | Adult        | Spring             | 2015.03.30       | 1198 | 4860  | 2948  | 5.3     | 0.017   | 0.931    |

|       |        |          |        |            |      |       |      |      |       |       |
|-------|--------|----------|--------|------------|------|-------|------|------|-------|-------|
| TRG-S | Male   | Immature | Spring | 2015.04.21 | 1134 | 3887  | 2533 | 4.74 | 0.049 | 0.93  |
| YM-S  | Female | Adult    | Spring | 2015.04.03 | 1198 | 6593  | 3421 | 4.74 | 0.054 | 0.911 |
| HXW-S | Female | Immature | Spring | 2015.03.30 | 1265 | 5829  | 3721 | 5.35 | 0.015 | 0.929 |
| GS-S  | Male   | Adult    | Spring | 2015.04.21 | 1249 | 8041  | 4075 | 4.3  | 0.072 | 0.948 |
| YZ-S  | Female | Adult    | Spring | 2015.03.30 | 870  | 3884  | 2145 | 4.21 | 0.046 | 0.957 |
| TT-S  | Female | Adult    | Spring | 2015.03.30 | 989  | 2751  | 2027 | 5.02 | 0.022 | 0.952 |
| TXH-S | Female | Adult    | Spring | 2015.04.10 | 1071 | 3981  | 2404 | 5.3  | 0.011 | 0.939 |
| DS-S  | Male   | Adult    | Spring | 2015.04.14 | 872  | 2344  | 1926 | 4.72 | 0.038 | 0.963 |
| YCY-S | Female | Adult    | Spring | 2015.04.13 | 1447 | 6440  | 3814 | 5.19 | 0.022 | 0.919 |
| YXX-S | Female | Adult    | Spring | 2015.04.10 | 1381 | 5341  | 3383 | 4.83 | 0.036 | 0.941 |
| TH-S  | Female | Adult    | Spring | 2015.04.20 | 930  | 3570  | 2245 | 4.92 | 0.025 | 0.927 |
| TG-S  | Male   | Adult    | Spring | 2015.04.04 | 2416 | 15950 | 7644 | 5.47 | 0.019 | 0.917 |
| HH-S  | Female | Adult    | Spring | 2015.04.12 | 1053 | 3967  | 2516 | 4.81 | 0.044 | 0.934 |
| YRB-S | Male   | Adult    | Spring | 2015.04.20 | 1331 | 6600  | 3742 | 4.99 | 0.03  | 0.921 |
| YXK-S | Male   | Immature | Spring | 2015.04.10 | 1369 | 6732  | 3685 | 5.18 | 0.019 | 0.935 |
| BT-S  | Male   | Adult    | Spring | 2015.04.01 | 754  | 3041  | 1817 | 4.19 | 0.09  | 0.943 |
| JT-S  | Male   | Adult    | Spring | 2015.04.10 | 1294 | 6135  | 3234 | 5.2  | 0.025 | 0.918 |

**Supplementary Table S2.** Taxonomy of Tibetan macaques' gut microbiome at phylum level (the mean relative abundance of per sample > 0.01% was presented,

each number in the table cell represent the proportion)

| Samples ID | Sampling period | Taxon (phylum) |                |            |               |                |                 |
|------------|-----------------|----------------|----------------|------------|---------------|----------------|-----------------|
|            |                 | Spirochaetia   | Proteobacteria | Firmicutes | Bacteroidetes | Actinobacteria | Verrucomicrobia |
| YRX-W      | winter          | 0.01406        | 0.30646        | 0.39828    | 0.24926       | 0.00885        | 0.00000         |
| TXL-W      | winter          | 0.01505        | 0.10832        | 0.38449    | 0.46216       | 0.00022        | 0.00055         |
| TRY-W      | winter          | 0.08173        | 0.09133        | 0.42662    | 0.34729       | 0.00191        | 0.00055         |
| THY-W      | winter          | 0.03754        | 0.25813        | 0.30471    | 0.36960       | 0.01629        | 0.00007         |
| BT-W       | winter          | 0.02456        | 0.15715        | 0.42053    | 0.33714       | 0.00180        | 0.00086         |
| TH-W       | winter          | 0.00548        | 0.24441        | 0.38798    | 0.33003       | 0.00966        | 0.00096         |
| TXH-W      | winter          | 0.06829        | 0.06659        | 0.43434    | 0.40543       | 0.00070        | 0.00101         |
| TRG-W      | winter          | 0.00882        | 0.32877        | 0.22608    | 0.25266       | 0.00226        | 0.00068         |
| TRYx-W     | winter          | 0.01712        | 0.21671        | 0.37944    | 0.31462       | 0.00085        | 0.00108         |
| TR-W       | winter          | 0.08237        | 0.24893        | 0.28634    | 0.35201       | 0.01273        | 0.00011         |
| ZL-W       | winter          | 0.00545        | 0.07610        | 0.50686    | 0.35177       | 0.00767        | 0.00281         |
| HT-W       | winter          | 0.00739        | 0.07073        | 0.49737    | 0.34191       | 0.00045        | 0.00134         |
| TXX-W      | winter          | 0.00400        | 0.22100        | 0.36501    | 0.34074       | 0.00053        | 0.00053         |
| YCLO-W     | winter          | 0.01553        | 0.11027        | 0.38448    | 0.43402       | 0.00069        | 0.00119         |
| DS-W       | winter          | 0.01186        | 0.23954        | 0.28772    | 0.37276       | 0.00552        | 0.00091         |
| YZ-W       | winter          | 0.01207        | 0.14978        | 0.47836    | 0.31749       | 0.00060        | 0.00011         |
| HH-W       | winter          | 0.06387        | 0.38781        | 0.31683    | 0.19289       | 0.02117        | 0.00000         |
| YXK-W      | winter          | 0.02329        | 0.11074        | 0.37844    | 0.41453       | 0.00058        | 0.00210         |
| ZB-W       | winter          | 0.04724        | 0.09882        | 0.43369    | 0.39281       | 0.00188        | 0.00116         |
| YM-W       | winter          | 0.00523        | 0.16198        | 0.44247    | 0.31785       | 0.00177        | 0.00276         |
| YRB-W      | winter          | 0.04560        | 0.21377        | 0.36579    | 0.35021       | 0.00321        | 0.00057         |
| YRQ-S      | spring          | 0.00267        | 0.05353        | 0.56698    | 0.34556       | 0.00114        | 0.00183         |

|        |        |         |         |         |         |         |         |
|--------|--------|---------|---------|---------|---------|---------|---------|
| HXM-S  | spring | 0.00347 | 0.10427 | 0.52608 | 0.33142 | 0.00193 | 0.00047 |
| ZL-S   | spring | 0.00047 | 0.04904 | 0.59866 | 0.33512 | 0.00179 | 0.00000 |
| YH-S   | spring | 0.00680 | 0.11929 | 0.49678 | 0.35976 | 0.00287 | 0.00028 |
| YCLA-S | spring | 0.00045 | 0.05205 | 0.57893 | 0.32811 | 0.00327 | 0.00007 |
| YRL-S  | spring | 0.05118 | 0.05811 | 0.42496 | 0.41861 | 0.00183 | 0.00096 |
| ZB-S   | spring | 0.01672 | 0.05233 | 0.54348 | 0.35824 | 0.00303 | 0.00092 |
| TRY-S  | spring | 0.01748 | 0.23828 | 0.42367 | 0.29263 | 0.01667 | 0.00018 |
| TXX-S  | spring | 0.00866 | 0.06699 | 0.48188 | 0.41569 | 0.00119 | 0.00109 |
| HT-S   | spring | 0.00952 | 0.02277 | 0.60149 | 0.31881 | 0.00461 | 0.00128 |
| TRG-S  | spring | 0.00637 | 0.18771 | 0.40057 | 0.36448 | 0.00191 | 0.00138 |
| YM-S   | spring | 0.00755 | 0.17549 | 0.35762 | 0.40934 | 0.00526 | 0.00275 |
| HXW-S  | spring | 0.01239 | 0.13106 | 0.55818 | 0.26730 | 0.00666 | 0.00037 |
| GS-S   | spring | 0.06178 | 0.27426 | 0.37309 | 0.23284 | 0.01769 | 0.00019 |
| YZ-S   | spring | 0.00098 | 0.17896 | 0.37369 | 0.40556 | 0.02927 | 0.00000 |
| TT-S   | spring | 0.00622 | 0.15031 | 0.50801 | 0.30580 | 0.00254 | 0.00188 |
| TXH-S  | spring | 0.00369 | 0.06396 | 0.52634 | 0.36460 | 0.00190 | 0.00170 |
| DS-S   | spring | 0.02189 | 0.05036 | 0.49054 | 0.28486 | 0.00245 | 0.00237 |
| YCY-S  | spring | 0.00431 | 0.09375 | 0.42245 | 0.44281 | 0.00153 | 0.00197 |
| YXX-S  | spring | 0.00370 | 0.15862 | 0.40053 | 0.40942 | 0.00398 | 0.00014 |
| TH-S   | spring | 0.01889 | 0.08425 | 0.41039 | 0.45995 | 0.01098 | 0.00107 |
| TG-S   | spring | 0.01849 | 0.06806 | 0.48818 | 0.40116 | 0.00177 | 0.00162 |
| HH-S   | spring | 0.01263 | 0.05393 | 0.44347 | 0.43720 | 0.00127 | 0.00138 |
| YRB-S  | spring | 0.00232 | 0.12336 | 0.40418 | 0.45267 | 0.00149 | 0.00065 |
| YXK-S  | spring | 0.00415 | 0.11236 | 0.45158 | 0.40017 | 0.00177 | 0.00184 |
| BT-S   | spring | 0.06300 | 0.30787 | 0.36245 | 0.24461 | 0.00115 | 0.00051 |
| JT-S   | spring | 0.01170 | 0.14183 | 0.52823 | 0.26381 | 0.00224 | 0.00051 |

**Supplementary Table S3.** Taxonomy of Tibetan macaques' gut microbiome at genus level (the mean relative abundance of per sample > 0.01% was presented,

each number in the table cell represent the proportion)

| Taxon (genus)                    | Samples ID |        |        |        |        |        |        |        |        |        |        |        |
|----------------------------------|------------|--------|--------|--------|--------|--------|--------|--------|--------|--------|--------|--------|
|                                  | YRQ-S      | HXM-S  | ZL-S   | YH-S   | YCLA-S | YRL-S  | ZB-S   | TRY-S  | TXX-S  | HT-S   | TRG-S  | YM-S   |
| <i>Succinivibrio</i>             | 0.2435     | 0.2015 | 0.2652 | 0.1946 | 0.2134 | 0.2081 | 0.1729 | 0.2326 | 0.2883 | 0.2355 | 0.2329 | 0.1286 |
| <i>Prevotella</i>                | 0.0114     | 0.0822 | 0.0250 | 0.0209 | 0.0045 | 0.0399 | 0.0315 | 0.2258 | 0.0310 | 0.0016 | 0.1762 | 0.1439 |
| <i>Porphyromonadaceae</i>        |            |        |        |        |        |        |        |        |        |        |        |        |
| <i>(OTU00002)</i>                | 0.0464     | 0.0206 | 0.0585 | 0.0175 | 0.0262 | 0.0308 | 0.0439 | 0.0596 | 0.0512 | 0.0977 | 0.0333 | 0.0333 |
| <i>Treponema</i>                 | 0.0049     | 0.0078 | 0.0125 | 0.0025 | 0.0004 | 0.0826 | 0.0120 | 0.0030 | 0.0455 | 0.0000 | 0.0260 | 0.1733 |
| <i>Helicobacter</i>              | 0.0255     | 0.0091 | 0.0099 | 0.0643 | 0.0367 | 0.0038 | 0.0124 | 0.0038 | 0.0125 | 0.0151 | 0.0030 | 0.0112 |
| <i>Bacteroidetes</i>             |            |        |        |        |        |        |        |        |        |        |        |        |
| <i>(OTU00009)</i>                | 0.0700     | 0.0199 | 0.0103 | 0.0084 | 0.0125 | 0.0130 | 0.0317 | 0.0063 | 0.0120 | 0.0186 | 0.0124 | 0.0094 |
| <i>Faecalibacterium</i>          | 0.0280     | 0.0141 | 0.0032 | 0.0370 | 0.0221 | 0.0121 | 0.0149 | 0.0089 | 0.0084 | 0.0124 | 0.0131 | 0.0118 |
| <i>Oscillibacter</i>             | 0.0027     | 0.0035 | 0.0005 | 0.0068 | 0.0004 | 0.0512 | 0.0167 | 0.0175 | 0.0087 | 0.0095 | 0.0064 | 0.0076 |
| <i>Clostridium XIVa</i>          | 0.0042     | 0.0083 | 0.0045 | 0.0176 | 0.0053 | 0.0225 | 0.0046 | 0.0523 | 0.0119 | 0.0027 | 0.0116 | 0.0074 |
| <i>Ruminococcus</i>              | 0.0170     | 0.0034 | 0.0418 | 0.0228 | 0.0092 | 0.0059 | 0.0095 | 0.0090 | 0.0227 | 0.0196 | 0.0027 | 0.0048 |
| <i>Clostridium sensu stricto</i> | 0.0326     | 0.0012 | 0.0001 | 0.0386 | 0.0040 | 0.0183 | 0.0264 | 0.0029 | 0.0313 | 0.0077 | 0.0197 | 0.0064 |
| <i>Alloprevotella</i>            | 0.0145     | 0.0108 | 0.0189 | 0.0119 | 0.0080 | 0.0076 | 0.0085 | 0.0086 | 0.0204 | 0.0106 | 0.0044 | 0.0043 |
| <i>Dialister</i>                 | 0.0005     | 0.0055 | 0.0063 | 0.0099 | 0.0261 | 0.0022 | 0.0091 | 0.0280 | 0.0008 | 0.0126 | 0.0121 | 0.0016 |
| <i>Barnesiella</i>               | 0.0078     | 0.0047 | 0.0272 | 0.0044 | 0.0110 | 0.0072 | 0.0029 | 0.0064 | 0.0061 | 0.0069 | 0.0075 | 0.0300 |
| <i>Clostridium XI</i>            | 0.0013     | 0.0034 | 0.0300 | 0.0102 | 0.0046 | 0.0047 | 0.0038 | 0.0112 | 0.0066 | 0.0050 | 0.0022 | 0.0042 |
| <i>Blautia</i>                   | 0.0069     | 0.0059 | 0.0033 | 0.0023 | 0.0067 | 0.0087 | 0.0030 | 0.0017 | 0.0101 | 0.0187 | 0.0019 | 0.0157 |

| <i>Roseburia</i>                 | 0.0066     | 0.0059 | 0.0085 | 0.0070 | 0.0102 | 0.0031 | 0.0074 | 0.0094 | 0.0049 | 0.0169 | 0.0039 | 0.0048 |
|----------------------------------|------------|--------|--------|--------|--------|--------|--------|--------|--------|--------|--------|--------|
| <i>Coprococcus</i>               | 0.0008     | 0.0050 | 0.0003 | 0.0043 | 0.0004 | 0.0036 | 0.0099 | 0.0197 | 0.0020 | 0.0002 | 0.0049 | 0.0056 |
| <i>Lachnospiraceae_</i>          |            |        |        |        |        |        |        |        |        |        |        |        |
| <i>incertae_sedis</i>            | 0.0008     | 0.0033 | 0.0000 | 0.0022 | 0.0034 | 0.0184 | 0.0005 | 0.0149 | 0.0075 | 0.0003 | 0.0075 | 0.0074 |
| <i>Escherichia/Shigella</i>      | 0.0027     | 0.0015 | 0.0091 | 0.0060 | 0.0036 | 0.0018 | 0.0053 | 0.0092 | 0.0057 | 0.0094 | 0.0013 | 0.0019 |
| <i>Clostridium IV</i>            | 0.0088     | 0.0022 | 0.0002 | 0.0107 | 0.0044 | 0.0023 | 0.0084 | 0.0038 | 0.0054 | 0.0048 | 0.0030 | 0.0062 |
| <i>Butyricoccus</i>              | 0.0023     | 0.0059 | 0.0006 | 0.0008 | 0.0027 | 0.0013 | 0.0049 | 0.0050 | 0.0193 | 0.0081 | 0.0046 | 0.0014 |
| <i>Catenibacterium</i>           | 0.0005     | 0.0041 | 0.0068 | 0.0025 | 0.0032 | 0.0048 | 0.0024 | 0.0022 | 0.0057 | 0.0034 | 0.0047 | 0.0064 |
| <i>Anaerostipes</i>              | 0.0084     | 0.0037 | 0.0010 | 0.0114 | 0.0042 | 0.0015 | 0.0040 | 0.0055 | 0.0042 | 0.0028 | 0.0003 | 0.0008 |
| <i>Gemmiger</i>                  | 0.0051     | 0.0030 | 0.0012 | 0.0050 | 0.0040 | 0.0019 | 0.0051 | 0.0009 | 0.0032 | 0.0047 | 0.0015 | 0.0034 |
| <i>Subdivision5_genera_</i>      |            |        |        |        |        |        |        |        |        |        |        |        |
| <i>incertae_sedis</i>            | 0.0008     | 0.0009 | 0.0017 | 0.0048 | 0.0021 | 0.0014 | 0.0011 | 0.0029 | 0.0017 | 0.0014 | 0.0012 | 0.0011 |
| <i>Flavonifractor</i>            | 0.0011     | 0.0027 | 0.0028 | 0.0015 | 0.0025 | 0.0008 | 0.0016 | 0.0006 | 0.0013 | 0.0009 | 0.0023 | 0.0003 |
| <i>Dorea</i>                     | 0.0008     | 0.0018 | 0.0043 | 0.0013 | 0.0008 | 0.0010 | 0.0016 | 0.0002 | 0.0011 | 0.0017 | 0.0010 | 0.0001 |
| <i>Clostridium XIVb</i>          | 0.0018     | 0.0005 | 0.0000 | 0.0003 | 0.0001 | 0.0010 | 0.0009 | 0.0002 | 0.0011 | 0.0013 | 0.0014 | 0.0026 |
| <i>Erysipelotrichaceae_</i>      |            |        |        |        |        |        |        |        |        |        |        |        |
| <i>incertae_sedis</i>            | 0.0000     | 0.0002 | 0.0003 | 0.0009 | 0.0005 | 0.0002 | 0.0003 | 0.0005 | 0.0005 | 0.0009 | 0.0003 | 0.0001 |
| Taxon (genus)                    | Samples ID |        |        |        |        |        |        |        |        |        |        |        |
|                                  | HXW-S      | GS-S   | YZ-S   | TT-S   | TXH-S  | DS-S   | YCY-S  | YXX-S  | TH-S   | TG-S   | HH-S   | YRB-S  |
| <i>Succinivibrio</i>             | 0.1861     | 0.0978 | 0.3781 | 0.2075 | 0.1298 | 0.0353 | 0.2515 | 0.2993 | 0.3500 | 0.2516 | 0.1288 | 0.3389 |
| <i>Prevotella</i>                | 0.0470     | 0.2539 | 0.1348 | 0.0623 | 0.0173 | 0.0018 | 0.0718 | 0.1230 | 0.0648 | 0.0417 | 0.0235 | 0.0806 |
| <i>Porphyromonadaceae</i>        |            |        |        |        |        |        |        |        |        |        |        |        |
| <i>(OTU00002)</i>                | 0.0271     | 0.0054 | 0.0311 | 0.0390 | 0.0343 | 0.0065 | 0.0458 | 0.0711 | 0.0954 | 0.0401 | 0.0278 | 0.0287 |
| <i>Treponema</i>                 | 0.0134     | 0.0295 | 0.0000 | 0.0073 | 0.0190 | 0.0237 | 0.0494 | 0.0267 | 0.0063 | 0.0435 | 0.1884 | 0.0066 |
| <i>Helicobacter</i>              | 0.0733     | 0.0081 | 0.0252 | 0.0731 | 0.0046 | 0.0056 | 0.0048 | 0.0095 | 0.0050 | 0.0096 | 0.0177 | 0.0120 |
| <i>Bacteroidetes</i>             |            |        |        |        |        |        |        |        |        |        |        |        |
| <i>(OTU00009)</i>                | 0.0200     | 0.0014 | 0.0098 | 0.0138 | 0.0125 | 0.0128 | 0.0376 | 0.0069 | 0.0095 | 0.0098 | 0.0157 | 0.0158 |
| <i>Faecalibacterium</i>          | 0.0158     | 0.0196 | 0.0025 | 0.0135 | 0.0278 | 0.0226 | 0.0175 | 0.0156 | 0.0091 | 0.0103 | 0.0091 | 0.0120 |
| <i>Oscillibacter</i>             | 0.0124     | 0.0617 | 0.0010 | 0.0062 | 0.0037 | 0.0219 | 0.0043 | 0.0036 | 0.0189 | 0.0185 | 0.0126 | 0.0023 |
| <i>Clostridium XIVa</i>          | 0.0070     | 0.0217 | 0.0333 | 0.0039 | 0.0092 | 0.0014 | 0.0095 | 0.0193 | 0.0344 | 0.0135 | 0.0032 | 0.0203 |
| <i>Ruminococcus</i>              | 0.0088     | 0.0028 | 0.0713 | 0.0120 | 0.0032 | 0.0035 | 0.0048 | 0.0068 | 0.0100 | 0.0086 | 0.0065 | 0.0094 |
| <i>Clostridium sensu stricto</i> | 0.0172     | 0.0114 | 0.0004 | 0.0044 | 0.0213 | 0.0000 | 0.0153 | 0.0096 | 0.0054 | 0.0106 | 0.0006 | 0.0080 |
| <i>Alloprevotella</i>            | 0.0154     | 0.0038 | 0.0183 | 0.0151 | 0.0080 | 0.0047 | 0.0026 | 0.0051 | 0.0151 | 0.0065 | 0.0072 | 0.0135 |
| <i>Dialister</i>                 | 0.0006     | 0.0110 | 0.0083 | 0.0214 | 0.0171 | 0.0000 | 0.0137 | 0.0018 | 0.0142 | 0.0020 | 0.0029 | 0.0145 |
| <i>Barnesiella</i>               | 0.0056     | 0.0040 | 0.0037 | 0.0059 | 0.0054 | 0.0003 | 0.0085 | 0.0063 | 0.0283 | 0.0084 | 0.0023 | 0.0159 |
| <i>Clostridium XI</i>            | 0.0086     | 0.0126 | 0.0134 | 0.0020 | 0.0031 | 0.0004 | 0.0035 | 0.0056 | 0.0046 | 0.0230 | 0.0050 | 0.0265 |
| <i>Blautia</i>                   | 0.0096     | 0.0002 | 0.0046 | 0.0088 | 0.0061 | 0.0128 | 0.0051 | 0.0055 | 0.0038 | 0.0191 | 0.0205 | 0.0038 |
| <i>Roseburia</i>                 | 0.0059     | 0.0010 | 0.0154 | 0.0089 | 0.0068 | 0.0014 | 0.0033 | 0.0094 | 0.0023 | 0.0157 | 0.0040 | 0.0067 |
| <i>Coprococcus</i>               | 0.0013     | 0.0150 | 0.0069 | 0.0013 | 0.0010 | 0.0001 | 0.0011 | 0.0009 | 0.0048 | 0.0186 | 0.0005 | 0.0034 |
| <i>Lachnospiraceae_</i>          |            |        |        |        |        |        |        |        |        |        |        |        |
| <i>incertae_sedis</i>            | 0.0022     | 0.0013 | 0.0008 | 0.0057 | 0.0083 | 0.0000 | 0.0046 | 0.0075 | 0.0060 | 0.0002 | 0.0039 | 0.0005 |
| <i>Escherichia/Shigella</i>      | 0.0059     | 0.0012 | 0.0033 | 0.0073 | 0.0034 | 0.0016 | 0.0025 | 0.0026 | 0.0095 | 0.0055 | 0.0013 | 0.0059 |
| <i>Clostridium IV</i>            | 0.0031     | 0.0002 | 0.0033 | 0.0047 | 0.0005 | 0.0034 | 0.0019 | 0.0016 | 0.0028 | 0.0104 | 0.0006 | 0.0046 |
| <i>Butyricoccus</i>              | 0.0029     | 0.0003 | 0.0015 | 0.0110 | 0.0054 | 0.0003 | 0.0046 | 0.0020 | 0.0007 | 0.0028 | 0.0024 | 0.0014 |
| <i>Catenibacterium</i>           | 0.0028     | 0.0003 | 0.0026 | 0.0024 | 0.0049 | 0.0008 | 0.0042 | 0.0075 | 0.0027 | 0.0066 | 0.0051 | 0.0049 |
| <i>Anaerostipes</i>              | 0.0017     | 0.0014 | 0.0162 | 0.0030 | 0.0016 | 0.0074 | 0.0006 | 0.0014 | 0.0021 | 0.0006 | 0.0021 | 0.0007 |
| <i>Gemmiger</i>                  | 0.0033     | 0.0003 | 0.0010 | 0.0026 | 0.0049 | 0.0035 | 0.0022 | 0.0021 | 0.0039 | 0.0029 | 0.0035 | 0.0026 |
| <i>Subdivision5_genera_</i>      |            |        |        |        |        |        |        |        |        |        |        |        |
| <i>incertae_sedis</i>            | 0.0023     | 0.0009 | 0.0102 | 0.0017 | 0.0015 | 0.0000 | 0.0015 | 0.0033 | 0.0043 | 0.0060 | 0.0012 | 0.0073 |
| <i>Flavonifractor</i>            | 0.0009     | 0.0026 | 0.0002 | 0.0023 | 0.0012 | 0.0012 | 0.0012 | 0.0014 | 0.0008 | 0.0021 | 0.0003 | 0.0017 |
| <i>Dorea</i>                     | 0.0010     | 0.0002 | 0.0002 | 0.0003 | 0.0026 | 0.0004 | 0.0006 | 0.0011 | 0.0025 | 0.0005 | 0.0011 | 0.0000 |
| <i>Clostridium XIVb</i>          | 0.0004     | 0.0002 | 0.0000 | 0.0019 | 0.0016 | 0.0024 | 0.0020 | 0.0001 | 0.0011 | 0.0016 | 0.0014 | 0.0007 |
| <i>Erysipelotrichaceae_</i>      |            |        |        |        |        |        |        |        |        |        |        |        |
| <i>incertae_sedis</i>            | 0.0003     | 0.0001 | 0.0020 | 0.0003 | 0.0003 | 0.0004 | 0.0005 | 0.0008 | 0.0007 | 0.0005 | 0.0001 | 0.0008 |

| incertae_sedis                   |            |        |        |        |        |        |        |        |        |        |        |        |
|----------------------------------|------------|--------|--------|--------|--------|--------|--------|--------|--------|--------|--------|--------|
| Taxon (genus)                    | Samples ID |        |        |        |        |        |        |        |        |        |        |        |
|                                  | YXK-S      | BT-S   | JT-S   | YRX-W  | TXL-W  | TRY-W  | THY-W  | BT-W   | TH-W   | TXH-W  | TRG-W  | TRYx-W |
| <i>Succinivibrio</i>             | 0.2325     | 0.1106 | 0.1578 | 0.2849 | 0.0538 | 0.0549 | 0.2379 | 0.1242 | 0.2065 | 0.0455 | 0.2827 | 0.1506 |
| <i>Prevotella</i>                | 0.0835     | 0.2909 | 0.1194 | 0.1817 | 0.1933 | 0.0720 | 0.2873 | 0.0357 | 0.1237 | 0.2022 | 0.1580 | 0.0796 |
| <i>Porphyromonadaceae</i>        |            |        |        |        |        |        |        |        |        |        |        |        |
| ( <i>OTU00002</i> )              | 0.0305     | 0.0008 | 0.0781 | 0.0029 | 0.0138 | 0.0701 | 0.0012 | 0.1683 | 0.0839 | 0.0295 | 0.0069 | 0.1053 |
| <i>Treponema</i>                 | 0.0559     | 0.0074 | 0.0001 | 0.0141 | 0.0150 | 0.0817 | 0.0375 | 0.0243 | 0.0055 | 0.0683 | 0.0088 | 0.0170 |
| <i>Helicobacter</i>              | 0.0025     | 0.0088 | 0.0077 | 0.0107 | 0.0095 | 0.0054 | 0.0028 | 0.0181 | 0.0277 | 0.0060 | 0.0399 | 0.0458 |
| <i>Bacteroidetes</i>             |            |        |        |        |        |        |        |        |        |        |        |        |
| ( <i>OTU00009</i> )              | 0.0116     | 0.0078 | 0.0285 | 0.0042 | 0.0269 | 0.0559 | 0.0026 | 0.0358 | 0.0107 | 0.0206 | 0.0024 | 0.0294 |
| <i>Faecalibacterium</i>          | 0.0199     | 0.0075 | 0.0105 | 0.0338 | 0.0143 | 0.0049 | 0.0447 | 0.0041 | 0.0103 | 0.0322 | 0.0122 | 0.0130 |
| <i>Oscillibacter</i>             | 0.0042     | 0.0629 | 0.0117 | 0.0132 | 0.0194 | 0.0139 | 0.0156 | 0.0184 | 0.0120 | 0.0149 | 0.0069 | 0.0077 |
| <i>Clostridium XIVa</i>          | 0.0153     | 0.0110 | 0.0003 | 0.0070 | 0.0128 | 0.0075 | 0.0067 | 0.0160 | 0.0111 | 0.0277 | 0.0137 | 0.0153 |
| <i>Ruminococcus</i>              | 0.0076     | 0.0027 | 0.0082 | 0.0093 | 0.0100 | 0.0514 | 0.0082 | 0.0058 | 0.0452 | 0.0487 | 0.0135 | 0.0057 |
| <i>Clostridium sensu stricto</i> | 0.0199     | 0.0000 | 0.0007 | 0.0687 | 0.0018 | 0.0148 | 0.0426 | 0.0032 | 0.0036 | 0.0096 | 0.0080 | 0.0050 |
| <i>Alloprevotella</i>            | 0.0089     | 0.0064 | 0.0096 | 0.0062 | 0.0835 | 0.0022 | 0.0200 | 0.0026 | 0.0044 | 0.0146 | 0.0035 | 0.0046 |
| <i>Dialister</i>                 | 0.0111     | 0.0057 | 0.0102 | 0.0161 | 0.0030 | 0.0032 | 0.0167 | 0.0078 | 0.0146 | 0.0047 | 0.0089 | 0.0064 |
| <i>Barnesiella</i>               | 0.0073     | 0.0038 | 0.0087 | 0.0046 | 0.0037 | 0.0023 | 0.0066 | 0.0015 | 0.0014 | 0.0249 | 0.0055 | 0.0025 |
| <i>Clostridium XI</i>            | 0.0095     | 0.0045 | 0.0043 | 0.0042 | 0.0042 | 0.0026 | 0.0019 | 0.0015 | 0.0017 | 0.0140 | 0.0028 | 0.0033 |
| <i>Blautia</i>                   | 0.0063     | 0.0001 | 0.0022 | 0.0020 | 0.0046 | 0.0023 | 0.0015 | 0.0014 | 0.0019 | 0.0024 | 0.0029 | 0.0024 |
| <i>Roseburia</i>                 | 0.0046     | 0.0046 | 0.0082 | 0.0010 | 0.0054 | 0.0036 | 0.0036 | 0.0128 | 0.0005 | 0.0022 | 0.0025 | 0.0003 |
| <i>Coprococcus</i>               | 0.0048     | 0.0253 | 0.0154 | 0.0050 | 0.0018 | 0.0002 | 0.0088 | 0.0013 | 0.0008 | 0.0008 | 0.0012 | 0.0013 |
| <i>Lachnospiracea_</i>           |            |        |        |        |        |        |        |        |        |        |        |        |
| <i>incertae_sedis</i>            | 0.0104     | 0.0020 | 0.0017 | 0.0014 | 0.0066 | 0.0008 | 0.0023 | 0.0006 | 0.0010 | 0.0028 | 0.0017 | 0.0044 |
| <i>Escherichia/Shigella</i>      | 0.0050     | 0.0028 | 0.0050 | 0.0013 | 0.0017 | 0.0007 | 0.0015 | 0.0022 | 0.0004 | 0.0032 | 0.0008 | 0.0066 |
| <i>Clostridium IV</i>            | 0.0020     | 0.0031 | 0.0141 | 0.0036 | 0.0034 | 0.0029 | 0.0009 | 0.0013 | 0.0017 | 0.0026 | 0.0010 | 0.0029 |
| <i>Butyricoccus</i>              | 0.0039     | 0.0026 | 0.0032 | 0.0001 | 0.0074 | 0.0005 | 0.0001 | 0.0000 | 0.0001 | 0.0033 | 0.0005 | 0.0074 |
| <i>Catenibacterium</i>           | 0.0032     | 0.0014 | 0.0026 | 0.0010 | 0.0075 | 0.0014 | 0.0003 | 0.0001 | 0.0004 | 0.0016 | 0.0009 | 0.0063 |
| <i>Anaerostipes</i>              | 0.0012     | 0.0006 | 0.0004 | 0.0000 | 0.0015 | 0.0007 | 0.0007 | 0.0002 | 0.0001 | 0.0044 | 0.0011 | 0.0040 |
| <i>Gemmiger</i>                  | 0.0025     | 0.0010 | 0.0039 | 0.0022 | 0.0007 | 0.0006 | 0.0030 | 0.0004 | 0.0006 | 0.0015 | 0.0000 | 0.0004 |
| <i>Subdivision5_genera_</i>      |            |        |        |        |        |        |        |        |        |        |        |        |
| <i>incertae_sedis</i>            | 0.0020     | 0.0011 | 0.0023 | 0.0000 | 0.0006 | 0.0006 | 0.0001 | 0.0009 | 0.0010 | 0.0010 | 0.0007 | 0.0011 |
| <i>Flavonifractor</i>            | 0.0009     | 0.0022 | 0.0012 | 0.0016 | 0.0007 | 0.0008 | 0.0009 | 0.0010 | 0.0005 | 0.0006 | 0.0005 | 0.0009 |
| <i>Dorea</i>                     | 0.0002     | 0.0001 | 0.0008 | 0.0004 | 0.0017 | 0.0013 | 0.0004 | 0.0002 | 0.0000 | 0.0009 | 0.0006 | 0.0006 |
| <i>Clostridium XIVb</i>          | 0.0018     | 0.0005 | 0.0005 | 0.0016 | 0.0015 | 0.0001 | 0.0004 | 0.0001 | 0.0006 | 0.0006 | 0.0003 | 0.0002 |
| <i>Erysipelotrichaceae_</i>      |            |        |        |        |        |        |        |        |        |        |        |        |
| <i>incertae_sedis</i>            | 0.0005     | 0.0000 | 0.0002 | 0.0004 | 0.0001 | 0.0002 | 0.0002 | 0.0001 | 0.0001 | 0.0002 | 0.0003 | 0.0001 |
| Taxon (genus)                    | Samples ID |        |        |        |        |        |        |        |        |        |        |        |
|                                  | HT-W       | TXX-W  | YCLO-W | DS-W   | YZ-W   | HH-W   | YXK-W  | ZB-W   | YM-W   | YRB-W  | TR-W   | ZL-W   |
| <i>Succinivibrio</i>             | 0.0383     | 0.1814 | 0.0774 | 0.1975 | 0.0989 | 0.2752 | 0.0629 | 0.0870 | 0.1097 | 0.1815 | 0.2205 | 0.0223 |
| <i>Prevotella</i>                | 0.1189     | 0.0793 | 0.1450 | 0.2313 | 0.0476 | 0.1147 | 0.0352 | 0.1292 | 0.0704 | 0.1508 | 0.2679 | 0.0580 |
| <i>Porphyromonadaceae</i>        |            |        |        |        |        |        |        |        |        |        |        |        |
| ( <i>OTU00002</i> )              | 0.0572     | 0.1556 | 0.0984 | 0.0110 | 0.1094 | 0.0002 | 0.1309 | 0.0316 | 0.0894 | 0.0770 | 0.0037 | 0.0988 |
| <i>Treponema</i>                 | 0.0074     | 0.0040 | 0.0155 | 0.0119 | 0.0121 | 0.0638 | 0.0233 | 0.0472 | 0.0052 | 0.0456 | 0.0823 | 0.0055 |
| <i>Helicobacter</i>              | 0.0104     | 0.0192 | 0.0201 | 0.0277 | 0.0352 | 0.1026 | 0.0082 | 0.0038 | 0.0336 | 0.0102 | 0.0184 | 0.0316 |
| <i>Bacteroidetes</i>             |            |        |        |        |        |        |        |        |        |        |        |        |
| ( <i>OTU00009</i> )              | 0.0346     | 0.0055 | 0.0120 | 0.0364 | 0.0222 | 0.0132 | 0.0348 | 0.0175 | 0.0035 | 0.0308 | 0.0088 | 0.0099 |
| <i>Faecalibacterium</i>          | 0.0040     | 0.0089 | 0.0155 | 0.0133 | 0.0055 | 0.0374 | 0.0014 | 0.0051 | 0.0090 | 0.0285 | 0.0417 | 0.0029 |
| <i>Oscillibacter</i>             | 0.0188     | 0.0071 | 0.0187 | 0.0131 | 0.0121 | 0.0154 | 0.0084 | 0.0261 | 0.0292 | 0.0074 | 0.0074 | 0.0294 |
| <i>Clostridium XIVa</i>          | 0.0339     | 0.0100 | 0.0206 | 0.0155 | 0.0375 | 0.0044 | 0.0235 | 0.0116 | 0.0124 | 0.0095 | 0.0087 | 0.0078 |
| <i>Ruminococcus</i>              | 0.0079     | 0.0068 | 0.0074 | 0.0082 | 0.0140 | 0.0104 | 0.0064 | 0.0051 | 0.0041 | 0.0149 | 0.0164 | 0.0072 |
| <i>Clostridium sensu stricto</i> | 0.0020     | 0.0040 | 0.0031 | 0.0204 | 0.0007 | 0.0293 | 0.0047 | 0.0157 | 0.0047 | 0.0189 | 0.0134 | 0.0026 |

|                             |        |        |        |        |        |        |        |        |        |        |        |        |
|-----------------------------|--------|--------|--------|--------|--------|--------|--------|--------|--------|--------|--------|--------|
| <i>Alloprevotella</i>       | 0.0011 | 0.0113 | 0.0267 | 0.0032 | 0.0088 | 0.0019 | 0.0017 | 0.0004 | 0.0007 | 0.0039 | 0.0073 | 0.0009 |
| <i>Dialister</i>            | 0.0018 | 0.0085 | 0.0033 | 0.0048 | 0.0078 | 0.0184 | 0.0031 | 0.0052 | 0.0096 | 0.0150 | 0.0132 | 0.0091 |
| <i>Barnesiella</i>          | 0.0104 | 0.0012 | 0.0073 | 0.0016 | 0.0001 | 0.0020 | 0.0010 | 0.0428 | 0.0003 | 0.0029 | 0.0031 | 0.0001 |
| <i>Clostridium XI</i>       | 0.0103 | 0.0037 | 0.0092 | 0.0003 | 0.0015 | 0.0033 | 0.0033 | 0.0074 | 0.0023 | 0.0071 | 0.0031 | 0.0003 |
| <i>Blautia</i>              | 0.0028 | 0.0055 | 0.0064 | 0.0005 | 0.0010 | 0.0081 | 0.0003 | 0.0020 | 0.0009 | 0.0079 | 0.0032 | 0.0012 |
| <i>Roseburia</i>            | 0.0010 | 0.0025 | 0.0015 | 0.0005 | 0.0007 | 0.0055 | 0.0014 | 0.0027 | 0.0032 | 0.0023 | 0.0045 | 0.0003 |
| <i>Coprococcus</i>          | 0.0003 | 0.0013 | 0.0015 | 0.0014 | 0.0009 | 0.0152 | 0.0010 | 0.0012 | 0.0003 | 0.0010 | 0.0108 | 0.0000 |
| <i>Lachnospiracea_</i>      |        |        |        |        |        |        |        |        |        |        |        |        |
| <i>incertae_sedis</i>       | 0.0030 | 0.0042 | 0.0050 | 0.0016 | 0.0023 | 0.0030 | 0.0012 | 0.0004 | 0.0009 | 0.0050 | 0.0044 | 0.0007 |
| <i>Escherichia/Shigella</i> | 0.0015 | 0.0009 | 0.0011 | 0.0022 | 0.0065 | 0.0031 | 0.0013 | 0.0030 | 0.0017 | 0.0009 | 0.0006 | 0.0008 |
| <i>Clostridium IV</i>       | 0.0018 | 0.0025 | 0.0008 | 0.0045 | 0.0011 | 0.0010 | 0.0001 | 0.0017 | 0.0013 | 0.0009 | 0.0015 | 0.0013 |
| <i>Butyricoccus</i>         | 0.0027 | 0.0023 | 0.0043 | 0.0004 | 0.0030 | 0.0010 | 0.0006 | 0.0001 | 0.0005 | 0.0015 | 0.0009 | 0.0000 |
| <i>Catenibacterium</i>      | 0.0016 | 0.0014 | 0.0015 | 0.0001 | 0.0024 | 0.0031 | 0.0001 | 0.0007 | 0.0004 | 0.0032 | 0.0006 | 0.0000 |
| <i>Anaerostipes</i>         | 0.0006 | 0.0031 | 0.0013 | 0.0008 | 0.0004 | 0.0022 | 0.0016 | 0.0009 | 0.0000 | 0.0027 | 0.0009 | 0.0000 |
| <i>Gemmiger</i>             | 0.0001 | 0.0007 | 0.0019 | 0.0003 | 0.0007 | 0.0036 | 0.0007 | 0.0007 | 0.0002 | 0.0013 | 0.0044 | 0.0005 |
| <i>Subdivision5_genera_</i> |        |        |        |        |        |        |        |        |        |        |        |        |
| <i>incertae_sedis</i>       | 0.0013 | 0.0005 | 0.0011 | 0.0009 | 0.0001 | 0.0000 | 0.0021 | 0.0012 | 0.0028 | 0.0006 | 0.0001 | 0.0028 |
| <i>Flavonifractor</i>       | 0.0007 | 0.0005 | 0.0010 | 0.0005 | 0.0011 | 0.0007 | 0.0001 | 0.0009 | 0.0008 | 0.0009 | 0.0007 | 0.0009 |
| <i>Dorea</i>                | 0.0002 | 0.0005 | 0.0016 | 0.0001 | 0.0006 | 0.0006 | 0.0001 | 0.0007 | 0.0001 | 0.0014 | 0.0013 | 0.0002 |
| <i>Clostridium XIVb</i>     | 0.0004 | 0.0008 | 0.0003 | 0.0005 | 0.0005 | 0.0006 | 0.0005 | 0.0003 | 0.0004 | 0.0000 | 0.0003 | 0.0008 |
| <i>Erysipelotrichaceae_</i> |        |        |        |        |        |        |        |        |        |        |        |        |
| <i>incertae_sedis</i>       | 0.0004 | 0.0004 | 0.0001 | 0.0002 | 0.0002 | 0.0010 | 0.0001 | 0.0001 | 0.0001 | 0.0002 | 0.0007 | 0.0000 |

---
